# Supplementary material for: Ixazomib, Lenalidomide, and Dexamethasone (IRD) Treatment with Cytogenetic Risk-Based Maintenance in Transplant-Eligible Myeloma: A Phase 2 Multicenter Study by the Nordic Myeloma Study Group
Source: MDPI journal article supplement (doi:10.3390/cancers16051024), 2024-02-29
Supplement: s1 [file s1]

Supplement figure S1. Progression-free survival according to detailed risk groups (ITT)

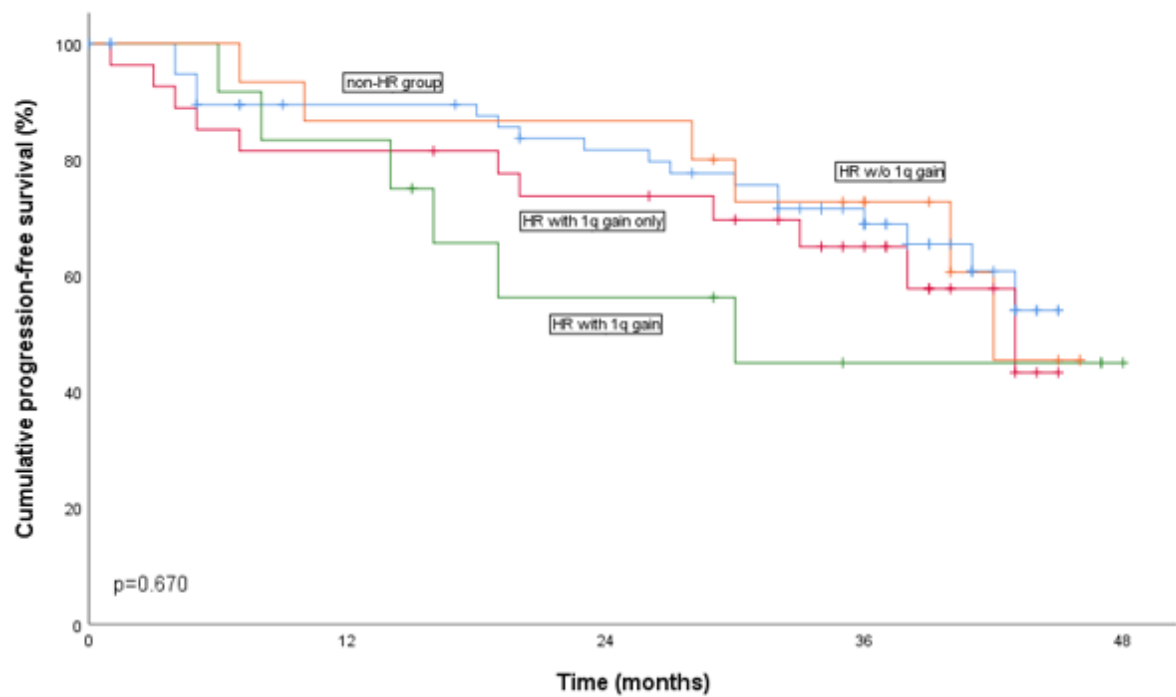

Patients at risk

|    |    |    |    |   |
|----|----|----|----|---|
| 62 | 47 | 41 | 26 | 0 |
| 29 | 22 | 19 | 11 | 0 |
| 11 | 10 | 6  | 3  | 0 |
| 14 | 13 | 12 | 7  | 0 |

Supplement figure S2. Progression-free survival a) and overall survival b) in myeloma patients with sustained undetectable MRD <10<sup>-5</sup>

a.

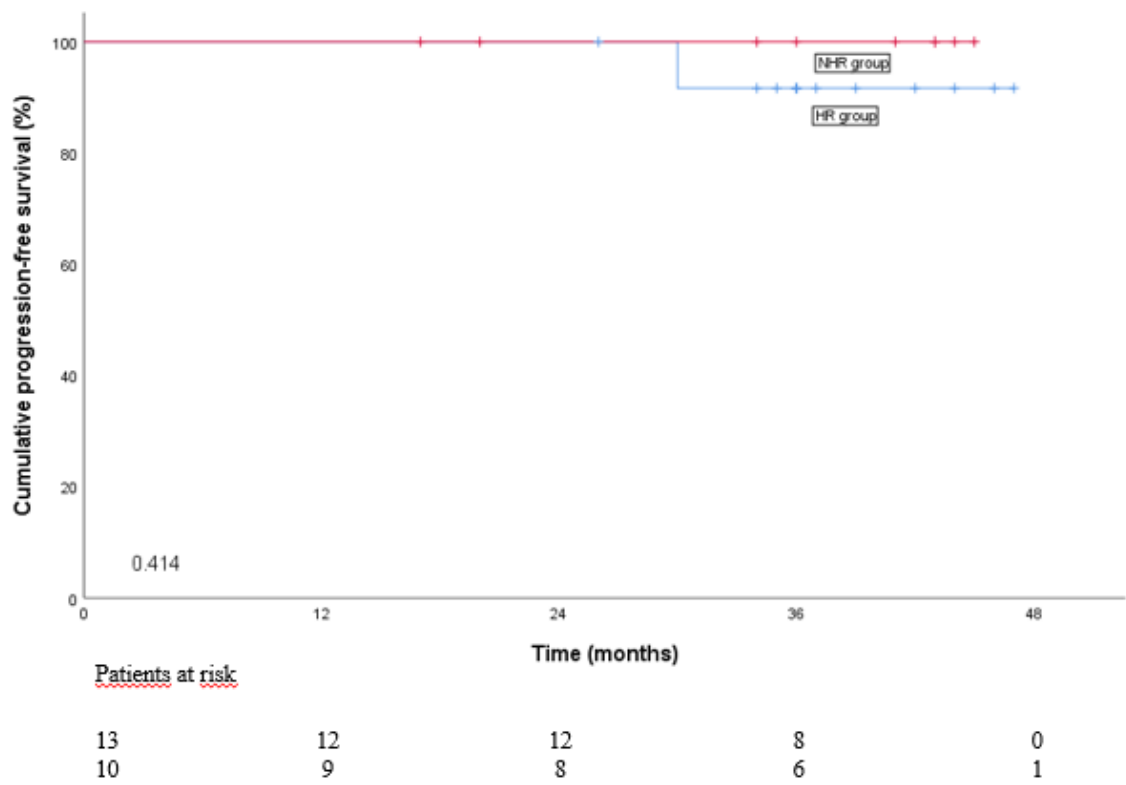

b.

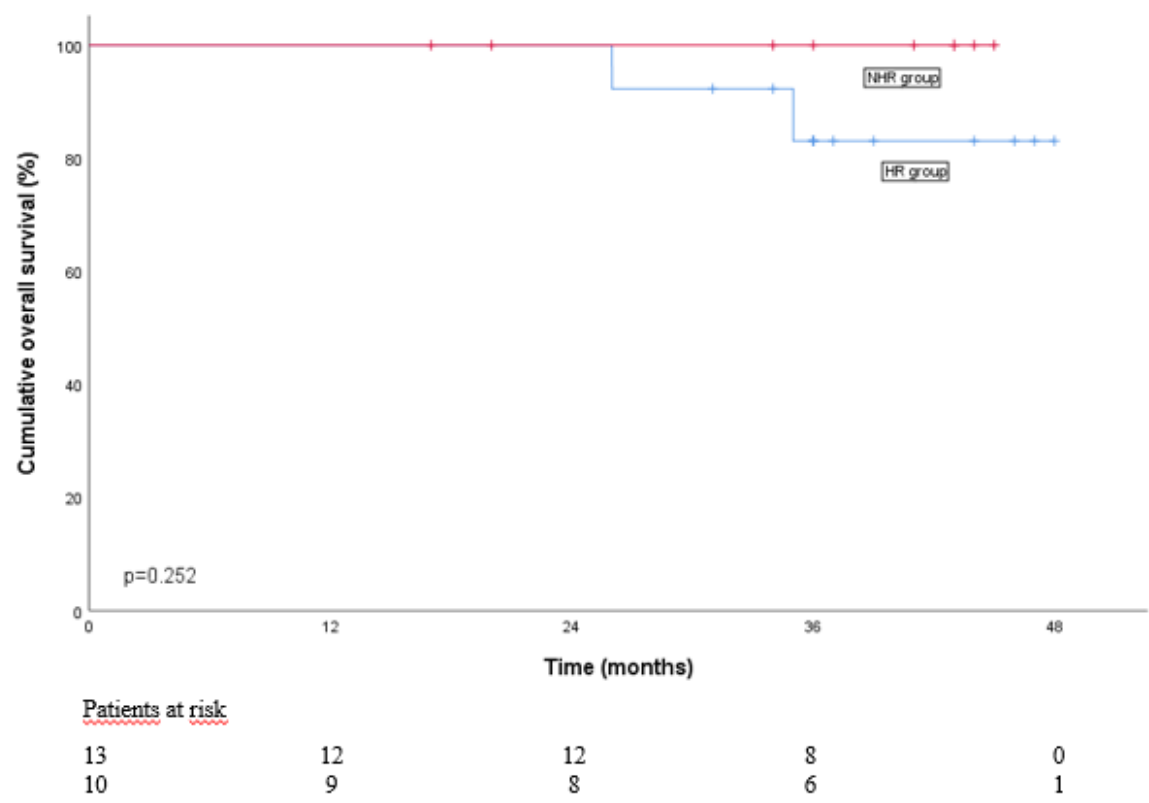

| <b>Supplement Table S1. Mobilization and collection data of 108 myeloma patients according to the risk groups</b>                                                                |                              |                               |                                  |
|----------------------------------------------------------------------------------------------------------------------------------------------------------------------------------|------------------------------|-------------------------------|----------------------------------|
| <b>Variable</b>                                                                                                                                                                  | <b>HR group<br/>n=54 (%)</b> | <b>NHR group<br/>n=54 (%)</b> | <b>Significance<br/><i>p</i></b> |
| <b>Mobilization type</b>                                                                                                                                                         |                              |                               | 0.272                            |
| <b>CY+FIL</b>                                                                                                                                                                    | 37 (68)                      | 43 (80)                       |                                  |
| <b>CY+PEG</b>                                                                                                                                                                    | 1 (2)                        |                               |                                  |
| <b>FIL alone</b>                                                                                                                                                                 | 16 (30)                      | 11 (20)                       |                                  |
| <b>PLER use</b>                                                                                                                                                                  | 20 (35)                      | 14 (22)                       | 0.270                            |
| <b>Peak blood CD34<sup>+</sup> cell count<br/>(x 10<sup>6</sup>/L), median (range)</b>                                                                                           | 42 (13-106)                  | 77 (16-212)                   | <b>0.045</b>                     |
| <b>Total collected CD34<sup>+</sup> cell yield †<br/>(x 10<sup>6</sup>/kg), median (range)</b>                                                                                   | 5.6 (0.2-19.2)               | 6.8 (1.8-15.9)                | 0.119                            |
| <b>Number of apheresis</b>                                                                                                                                                       |                              |                               | 0.389                            |
| <b>1</b>                                                                                                                                                                         | 23 (43)                      | 23 (43)                       |                                  |
| <b>2</b>                                                                                                                                                                         | 19 (35)                      | 24 (44)                       |                                  |
| <b>3</b>                                                                                                                                                                         | 6 (11)                       | 4 (7)                         |                                  |
| <b>4</b>                                                                                                                                                                         | 5 (9)                        | 1 (2)                         |                                  |
| <b>Abbreviations:</b> CY+FIL=cyclophosphamide+filgrastim; CY+PEG=cyclophosphamide+pegfilgrastim;<br>FIL=filgrastim;PLER=plerixafor; HR=high risk<br>† four mobilization failures |                              |                               |                                  |

**Supplement Table S2. Associations of different variables with PFS in 120 patients with myeloma**

| Variable                         | Exp (B) | 95% CI        | <i>p</i>          |
|----------------------------------|---------|---------------|-------------------|
| <b>Gender</b>                    |         |               |                   |
| Male                             | 1       |               |                   |
| Female                           | 1.648   | 0.899-3.022   | 0.106             |
| <b>Age</b>                       |         |               |                   |
| ≤65                              | 1       |               |                   |
| >65                              | 1.464   | 0.756-2.833   | 0.258             |
| <b>ECOG</b>                      |         |               |                   |
| 0                                | 1       |               |                   |
| 1                                | 1.076   | 0.561-2.063   | 0.826             |
| 2                                | 1.150   | 0.391-3.383   | 0.799             |
| <b>IMWG risk group</b>           |         |               |                   |
| low                              | 1       |               |                   |
| standard                         | 2.384   | 0.842-6.749   | 0.102             |
| high                             | 1.654   | 0.464-5.895   | 0.437             |
| <b>R-ISS</b>                     |         |               |                   |
| 1                                | 1       |               |                   |
| 2                                | 2.656   | 1.163-6.065   | <b>0.020</b>      |
| 3                                | 7.279   | 2.415-21.940  | <b>&lt; 0.001</b> |
| <b>Cytogenetic risk group</b>    |         |               |                   |
| HR                               | 1       |               |                   |
| NHR                              | 0.770   | 0.419-1.415   | 0.400             |
| <b>Best serological response</b> |         |               |                   |
| sCR                              | 1       |               |                   |
| CR                               | 0.933   | 0.503-1.733   | 0.827             |
| VGPR                             | 0.854   | 0.452-1.614   | 0.628             |
| PR                               | 1.328   | 0.608-2.899   | 0.477             |
| <b>Flow-MRD 10<sup>-4</sup></b>  |         |               |                   |
| sustained undetectable           | 1       |               |                   |
| turned positive                  | 40.382  | 5.039-323.625 | <b>&lt; 0.001</b> |
| positive                         | 28.167  | 3.843-206.453 | <b>0.001</b>      |
| undetectable once                |         |               | 0.981             |
| <b>Flow-MRD 10<sup>-5</sup></b>  |         |               |                   |
| sustained undetectable           | 1       |               |                   |
| turned positive                  | 11.106  | 1.300-95.571  | <b>0.028</b>      |
| positive                         | 16.495  | 2.256-120.596 | <b>0.006</b>      |
| undetectable once                |         |               | 0.982             |
